# Supplementary material for: Candidate Causal Variants at the 8p12 Breast Cancer Risk Locus Regulate DUSP4
Source: Preprints.org preprint supplement (doi:10.20944/preprints201911.0271.v1), 2019-11-24
Supplement: Supplementary file 1 [file supplementary]

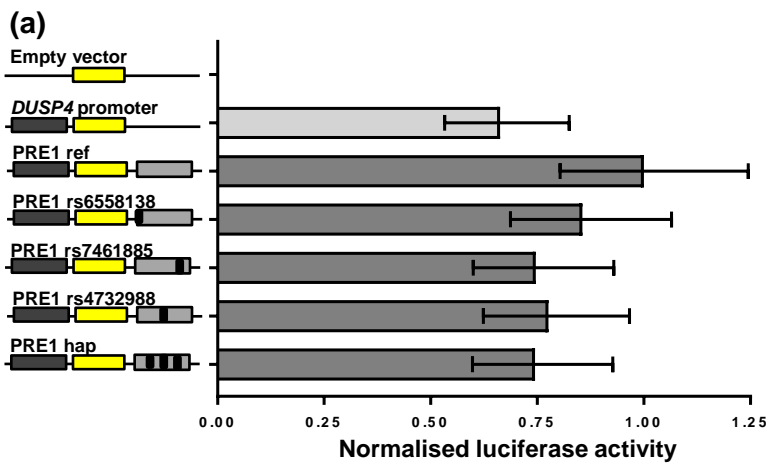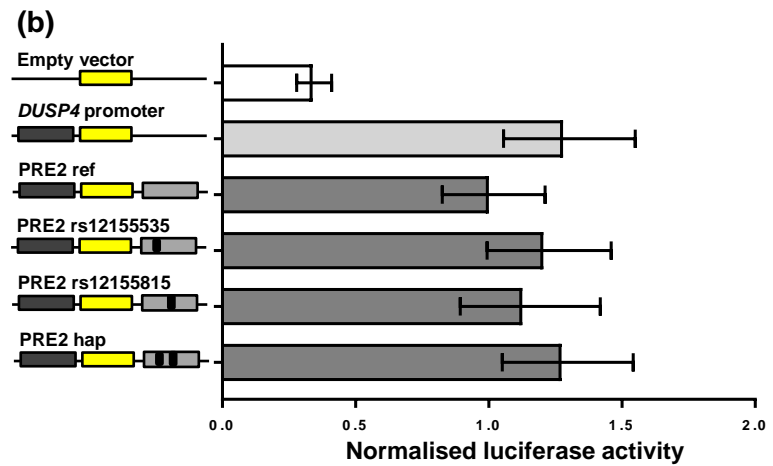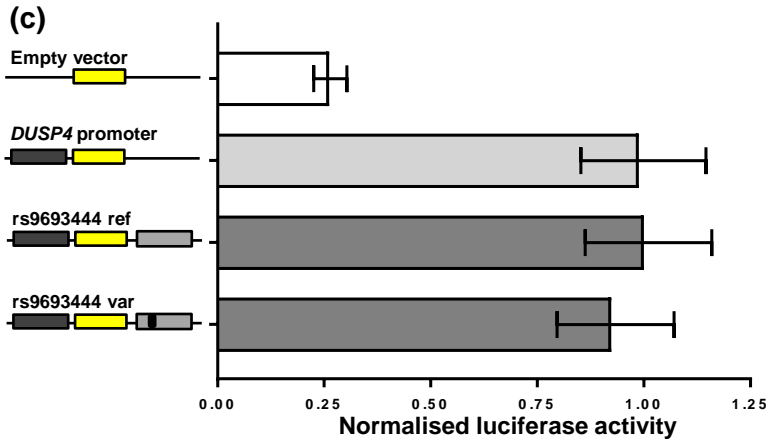

**Supplementary Figure S1.** Luciferase reporter gene analysis of PRE1-3 in T-47D cells. PRE1, PRE2 and PRE3 reference regions, containing protective allelic variants of CCVs, were cloned downstream of a *DUSP4* promoter luciferase construct for the creation of reference (ref) constructs. Risk allelic variants of CCVs were engineered into the constructs and are designated by the rs ID of the corresponding variant. Constructs containing risk allele haplotypes (hap) were also generated. Cells were transiently transfected with each of these constructs and assayed for luciferase activity after 24 h. Panels show back-transformed data for: **(a)** PRE1 activity; **(b)** PRE2; and **(c)** PRE3 activity. Error bars denote 95% confidence intervals of experiments performed in triplicate. P-values were determined two-way ANOVA followed by Dunnett's multiple comparisons test.
