# Supplementary material for: Candidate Causal Variants at the 8p12 Breast Cancer Risk Locus Regulate DUSP4
Source: Preprints.org preprint supplement (doi:10.20944/preprints201911.0271.v1), 2019-11-24
Supplement: Supplementary file 1 [file supplementary]

## Sheet: ST1
Supplementary Table S1: 8p12 CCVs
CCV	Chr	hg19 position	Risk allele	PRE
rs34099083	8	29497050	A	-
rs11136083	8	29502062	A	-
rs145412940	8	29504887	A	-
rs7461857	8	29504986	G	-
rs7459709	8	29504991	T	-
rs7465364	8	29505165	A	-
rs7845360	8	29505608	A	-
rs7463114	8	29507094	T	-
rs9693444	8	29509616	A	PRE3
rs56218124	8	29517651	A	-
rs11785787	8	29520885	C	-
rs12155535	8	29523513	C	PRE2
rs12155815	8	29523536	T	PRE2
rs4732988	8	29527784	A	PRE1
rs7461885	8	29529168	A	PRE1
rs6558138	8	29529591	C	PRE1

## Sheet: ST2
Supplementary Table S2: 3C primers
Primer name	Sequence
DUSP frag1	ACTCTGAACAGGTCAGCCTGTGACTTGTCC
DUSP frag2	CAAATAAGTGTCCCTAGGACAGCCTCTTTCTGC
DUSP frag3	AGAGATCAACCACTAAATCACCTTGACCTTGACC
DUSP frag4	GGAGAGGTACCATGAGGCATCCCAATATCC
DUSP frag5	AGAAGCCCACAGGGACGAAGTGACC
DUSP frag6	GTCCACCTCTGTGAAGTGAGTTGTTGAAACG
DUSP frag7	TCTCACTCTGGACTAACCTTCAGAGCACTGG
DUSP frag8	CTGCTGCCTTGGCTATTGGCTGTTAGG
DUSP frag9	GTTTAGACACTCAGGAATGAGTGAACCAGTTGC
DUSP frag10	CAGGGACAAGTGTAGAATGGAGTCCAGAGG
DUSP frag11	CAAGATCGGAAGTCACACCTGGAAACAGC
rs121555355 AS gDNA fwd	CTCCCTGGTGATTCTCACATGCAACC
rs12155535 AS seq	TCATAACTCCTCTGCAACACGTAAA
rs12155535 AS rev2	GCTGTTGTCTTCCCTTTACTCTGTTTTCAGG
rs12155535 AS rev	GAAGGTATTTGAGAGCCTTAGGGAAGAAGAATGG
DUSP frag12	ACTTGTGGAAGAGGGACCAGGTCTCTGG
DUSP frag13	GTCAGTGTGGAGTTTCTTCAAGCTGGTGC
DUSP frag14	AGAAGTTGGGAGGTACTGCTTTAGATGGAGAGG
DUSP frag15	ACCACATGTCATGACACCCTCTCTAAGTTCTAGG

## Sheet: ST3
Supplementary Table S3: Primers for generation of reporter gene constructs
DUSP4 ext prom fwd1	GTGCCAAGGGATGAAAGCTCAAACC
DUSP4 prom seqF2	CCTCAGCCGGCTATTTCCTTT
DUSP4 prom HindIII rev	AAGCTTGGTGGAGGAGAGTGTGTTTACG
DUSP4 prom rev	AAGCTTAGAAGGGACGCCTGCAGAAGTGG
DUSP4 PRE1 fwd	GGATCCGGGCAAGTCTTCAGCCAAACTTCC
rs6558138_C rev	CTTCTTTCAGACCAAAAGTCTACAAATAAAACAC
rs6558138G 3'	CTTCTTTCAGACCAAAACTCTACAAATAAAACAC
rs6558138_C fwd	GTGTTTTATTTGTAGACTTTTGGTCTGAAAGAAG
rs6558138G 5'	GTGTTTTATTTGTAGAGTTTTGGTCTGAAAGAAG
DUSP4 PRE1 seqF1	GCCACAAATGCAATGCTATGTT
rs7461885 EMSA 5'	TGCCCCATCCGAAGCTCCATCTTTGCTCAG
rs7461885 EMSA 3'	CTGAGCAAAGATGGAGCTTCGGATGGGGCA
rs7461885T 5'	CCCATCCGAAGCTCCATCTTTGCTCAGG
rs7461885_G rev	CCTGAGCAAAGATGGCGCTTCGGATGGG
rs7461885_G fwd	CCCATCCGAAGCGCCATCTTTGCTCAGG
rs7461885T 3'	CCTGAGCAAAGATGGAGCTTCGGATGGG
DUSP4 PRE1 seqF2	CCAGAGAAATATCACTTATCTCAGAC
DUSP4 PRE1 seqF3	GGGAGTGAATAGTTTCAGGATGATTCA
DUSP4 PRE1 seqF4	GAGGAAGAATGGCTTTGCGAA
rs4732988_G fwd	GGCTAATTTTTTTGTTTTGTTTTGTATTTTTAG
rs4732988T 3'	CTAAAAATACAAAACAAAAAAAAAAAATTAGCC
rs4732988_G rev	CTAAAAATACAAAACAAAACAAAAAAATTAGCC
rs4732998T 5'	GGCTAATTTTTTTTTTTTGTTTTGTATTTTTAG
DUSP4 PRE1 rev	GTCGACAATCTGGTCACACCTATTTCCAATGAGC
