# Supplementary material for: Candidate Causal Variants at the 8p12 Breast Cancer Risk Locus Regulate DUSP4
Source: Preprints.org preprint supplement (doi:10.20944/preprints201911.0271.v1), 2019-11-24
Supplement: Supplementary file 2 [file supplementary]

Archive with 2 entries (2 files):
- Supp Fig 1_T47D luciferase assays.pdf
- Supplementary tables S1-3.xlsx
